# Supplementary material
Source: ML conference proceedings conference paper supplement (https://proceedings.mlr.press/v164/lee22a.html)
Supplement: Supplementary file 1 [file lee22a-supp.zip]

Archive with 2 entries (2 files):
- CoRL2021__Skill_Chaining_appendix.pdf
- __MACOSX/._CoRL2021__Skill_Chaining_appendix.pdf
